# Supplementary material for: Shikonin selectively induces apoptosis in human prostate cancer cells through the endoplasmic reticulum stress and mitochondrial apoptotic pathway
Source: PubMed Central journal article supplement (PMC4389804; doi:10.1186/s12929-015-0127-1), 2015-04-01

# Supplementary Figure S1

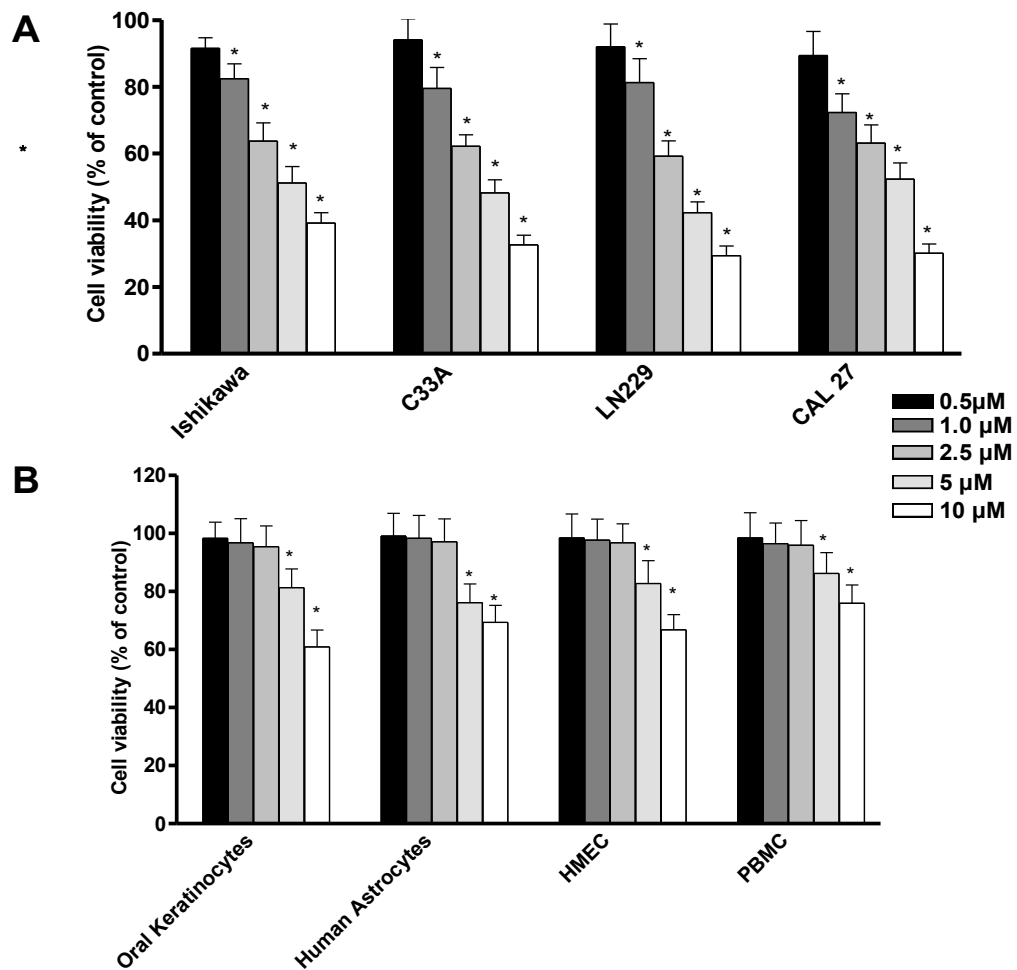

## Supplementary Figure S2

Effect of shikonin on Prostate cancer cell proliferation

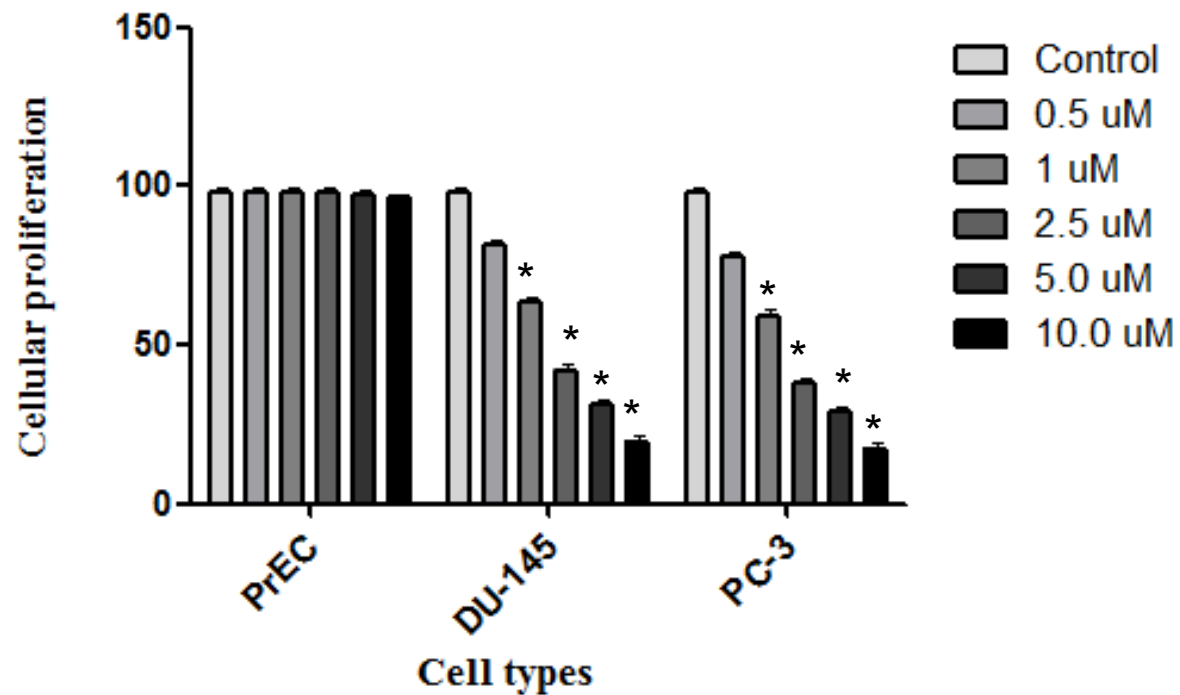

# Supplementary Figure S3

Effect of shikonin on sequential activation of caspase-9 and 3 in Prostate cancer cells

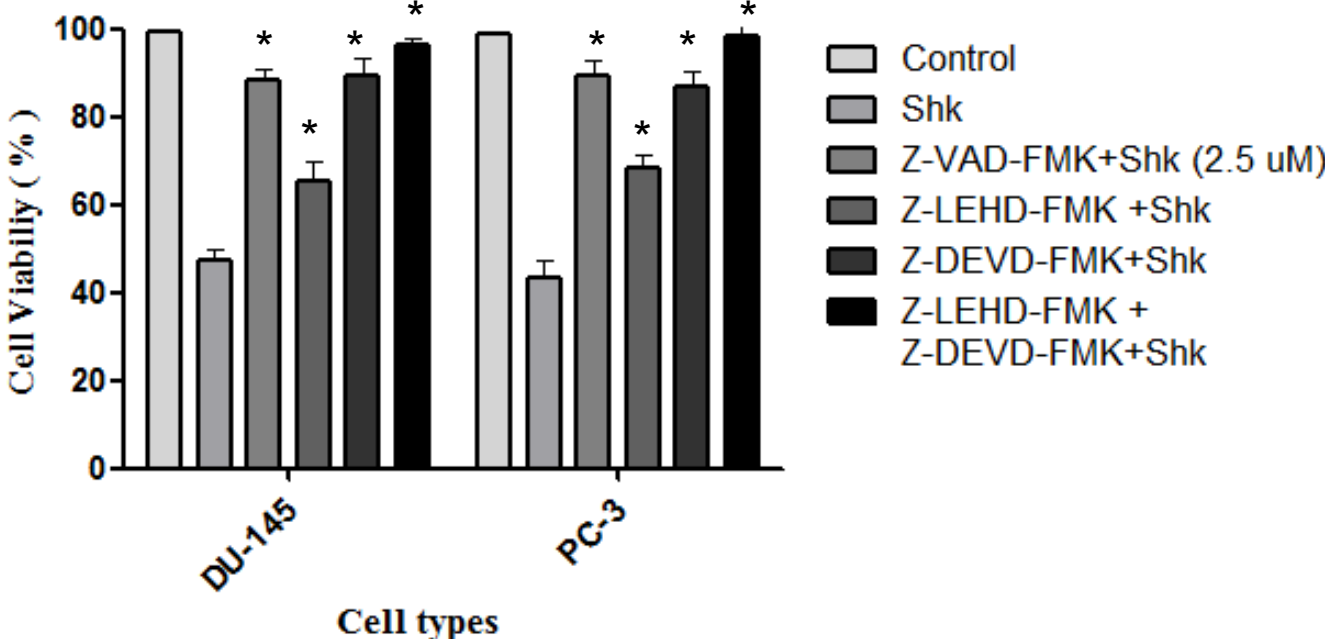

Supplement: 12929_2015_127_MOESM2_ESM.pdf [file 12929_2015_127_MOESM2_ESM.pdf]
